# Supplementary material for: Lewis-base adducts of 9,10-dihydro-9,10-diboraanthracene: ditopic hydroboration reagents and a B–N analogue of triptycene
Source: Royal Society of Chemistry journal article supplement (doi:10.1039/c001803a), 2010-01-01
Supplement: c001803a.pdf [file c001803a.pdf]

# Supplementary Material

for the paper

## Lewis-Base Adducts of 9,10-Dihydro-9,10-diboraanthracene: Ditopic Hydroboration Reagents and a B-N Analogue of Triptycene

Andreas Lorbach, Michael Bolte, Hans-Wolfram Lerner and Matthias Wagner

*Content:*

1. Syntheses and NMR spectroscopic characterisations of **3**, **5**, **6**, Li[**7**], and hydroboration of *t*BuCCH with **3** and **5**
2. Single crystal X-ray structure analyses of **3**, **6**·THF, Li(thf)<sub>4</sub>[**7**]·THF

## 1. Syntheses and NMR spectroscopic characterisations of **3**, **5**, **6**, Li[7], and hydroboration of *t*BuCCH with **3** and **5**

All reactions were carried out under an atmosphere of dry nitrogen using Schlenk techniques. (Deutero)benzene, diethyl ether, dimethyl sulphide, hexane and (*d*<sub>8</sub>-)THF were dried over Na/benzophenone and freshly distilled prior to use. NMR: Bruker AM250, Avance300 and Avance400; all NMR spectra were measured at 20 °C. Chemical shifts are referenced to residual solvent peaks (<sup>1</sup>H, <sup>13</sup>C{<sup>1</sup>H}) or external BF<sub>3</sub>·Et<sub>2</sub>O (<sup>11</sup>B, <sup>11</sup>B{<sup>1</sup>H}) and Si(CH<sub>3</sub>)<sub>4</sub> (<sup>29</sup>Si INEPT). Abbreviations: s = singlet, d = doublet, m = multiplet, br = broad, n. o. = not observed, bpdz = benzo[*d*]pyridazine, pdz = pyridazine, pz = 4-trimethylsilylpyrazolide.

**Synthesis of 3.** A clear solution of **1** (525 mg, 2.99 mmol) in dimethyl sulphide (35 cm<sup>3</sup>) was cooled to -78 °C to yield colourless crystals of **3** suitable for X-ray crystallography. The crystals were collected on a frit and dried under dynamic vacuum for 30 min (392 mg, 44%).

<sup>1</sup>H NMR: δ<sub>H</sub>(300.0 MHz; C<sub>6</sub>D<sub>6</sub>) 1.16 (12 H, s, SCH<sub>3</sub>), 5.48 (2 H, br s, *h*<sub>1/2</sub> = 200 Hz, BH), 7.38 (4 H, m, C<sub>6</sub>H<sub>4</sub>), 8.00 (4 H, m, C<sub>6</sub>H<sub>4</sub>); <sup>11</sup>B NMR: δ<sub>B</sub>(96.3 MHz; C<sub>6</sub>D<sub>6</sub>) 28.1 (br s, *h*<sub>1/2</sub> = 370 Hz), δ<sub>B</sub>(96.3 MHz; DMS) 1.9 (br d, *J*<sub>BH</sub> ≈ 60 Hz); <sup>13</sup>C{<sup>1</sup>H} NMR: δ<sub>C</sub>(75.5 MHz; C<sub>6</sub>D<sub>6</sub>) 18.5 (SCH<sub>3</sub>), 129.3 (C<sub>6</sub>H<sub>4</sub>), 138.5 (C<sub>6</sub>H<sub>4</sub>), n. o. (BC). *Note:* All chemical shifts are strongly influenced by the amount of dimethyl sulphide present in the sample.

**Hydroboration of *t*BuCCH with 3.** Neat *t*BuCCH (30 mg, 0.37 mmol) was added via syringe to **3** (22.1 mg, 0.0736 mmol) in benzene (4 cm<sup>3</sup>) at r. t. The mixture was stirred for 30 min and then freeze-dried for 2 h in a dynamic vacuum. All NMR spectroscopic data of the resulting colourless microcrystalline residue were in agreement with literature values of **4**. No <sup>1</sup>H NMR signal for SME<sub>2</sub> (free or coordinated) was detectable; combustion analysis of the sample gave a relative sulphur content of 0%.

**Synthesis of 5.** A vigorously stirred solution of **3** (47.3 mg, 0.158 mmol) in benzene (8 cm<sup>3</sup>) was treated at r. t. with pyridazine (12.7 mg, 0.159 mmol) whereupon a voluminous yellow solid formed. After 1 h, the precipitate was isolated by centrifugation and dried in vacuum. **5**·0.25 C<sub>6</sub>H<sub>6</sub> (34 mg, 78%) was obtained as a yellow microcrystalline solid (*note:* The amount of benzene was estimated by <sup>1</sup>H NMR spectroscopy). Reprecipitation of **5**·0.25 C<sub>6</sub>H<sub>6</sub> from a THF solution into hexane yielded benzene-free samples.

<sup>1</sup>H NMR: δ<sub>H</sub>(400.1 MHz; *d*<sub>8</sub>-THF) 4.47 (2 H, br s, *h*<sub>1/2</sub> = 240 Hz, BH), 6.72 (4 H, m, C<sub>6</sub>H<sub>4</sub>), 7.39 (4 H, m, C<sub>6</sub>H<sub>4</sub>), 8.08 (2 H, m, pdzH-4,5), 9.63 (2 H, m, pdzH-3,6); <sup>11</sup>B NMR: δ<sub>B</sub>(128.4 MHz; *d*<sub>8</sub>-THF) 5.3 (br s, *h*<sub>1/2</sub> = 230 Hz); <sup>13</sup>C{<sup>1</sup>H} NMR: δ<sub>C</sub>(62.9 MHz; *d*<sub>8</sub>-THF) 124.4 (C<sub>6</sub>H<sub>4</sub>), 131.0 (C<sub>6</sub>H<sub>4</sub>), 135.1

(pdzC-4,5), 149.8 (pdzC-3,6), n. o. (BC). Found: C, 74.8; H, 5.5; N, 10.7.  $C_{16}H_{14}B_2N_2$  requires C, 75.1; H, 5.5; N, 11.0.

**Hydroboration of *t*BuCCH with **5**.** A solution of **5**·0.25  $C_6H_6$  (1 mg, 0.004 mmol) in  $d_8$ -THF ( $0.5\text{ cm}^3$ ) was transferred to an NMR tube and treated with excess *t*BuCCH (10 mg, 0.1 mmol). The NMR tube was flame-sealed and kept at 20 °C for 2 h.  $^1H$  NMR spectroscopy revealed approximately 50% conversion (Fig. S1). Therefore, the sample was stored at 40 °C for further 30 min to achieve quantitative conversion (Fig. S1).

$^1H$  NMR:  $\delta_H$ (300.0 MHz;  $d_8$ -THF) 1.33 (18 H, s,  $CH_3$ ), 6.45 (2 H, d,  $J_{HH} = 18.6$  Hz, C(H)=C(H)), 6.67 (2 H, d,  $J_{HH} = 18.6$  Hz, C(H)=C(H)), 6.78 (4 H, m,  $C_6H_4$ ), 7.54 (4 H, m,  $C_6H_4$ ), 7.99 (2 H, br s, pdzH-4,5), 9.77 (2 H, br s, pdzH-3,6);  $^{11}B\{^1H\}$  NMR:  $\delta_B$ (96.3 MHz;  $d_8$ -THF) 4.6 (br s,  $h_{1/2} = 700$  Hz).

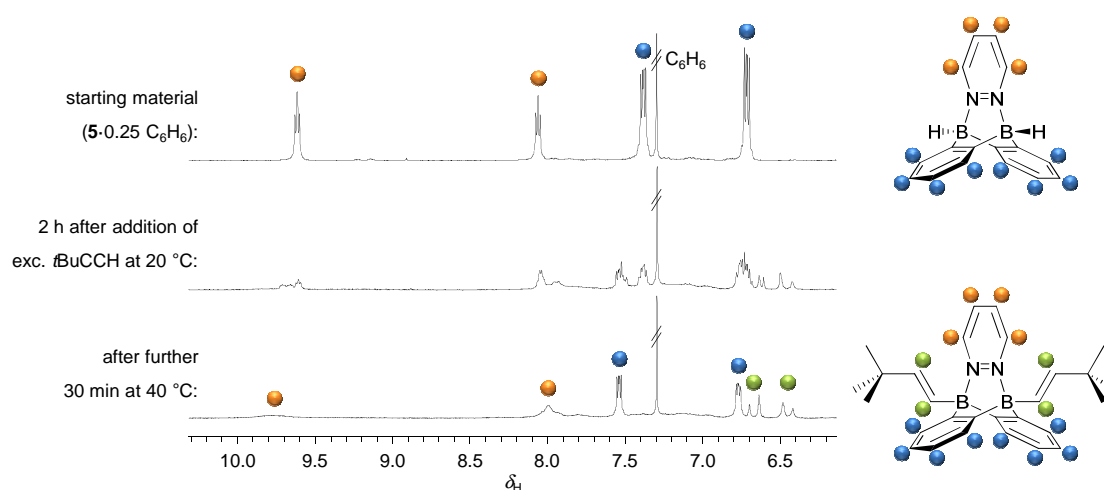

**Fig. S1** Hydroboration of *t*BuCCH with **5**·0.25  $C_6H_6$  in  $d_8$ -THF.

*Note:* The hydroboration of *t*BuCCH with Li[**7**] is also possible under similar conditions, however, it requires higher reaction temperatures of 60 °C.

**Synthesis of **6**.** Benzo[*d*]pyridazine (13 mg, 0.10 mmol) in benzene ( $1\text{ cm}^3$ ) was added dropwise at r. t. to a stirred solution of **3** (25.5 mg, 0.0850 mmol) in benzene ( $3\text{ cm}^3$ ), whereupon a pale yellow solid precipitated. Stirring was continued for 30 min and afterwards all volatiles were removed in vacuum. Yellow X-ray quality crystals of **6**·THF were grown by vapour diffusion of diethyl ether into a THF ( $4\text{ cm}^3$ ) solution of the crude product (4 mg, 12% based on isolated single crystalline material).

$^1H$  NMR:  $\delta_H$ (400.1 MHz;  $d_8$ -THF) 4.52 (2 H, br s,  $h_{1/2} = 170$  Hz, BH), 6.74 (4 H, m,  $C_6H_4$ ), 7.42 (4 H, m,  $C_6H_4$ ), 8.20 (2 H, m, bpdzH), 8.36 (2 H, m, bpdzH), 10.21 (2 H, s, bpdzH-1,4);  $^{11}B$  NMR:  $\delta_B$ (96.3 MHz;  $d_8$ -THF) 4.4 (br s,  $h_{1/2} = 390$  Hz);  $^{13}C\{^1H\}$  NMR:  $\delta_C$ (62.9 MHz;  $d_8$ -THF) 124.4 ( $C_6H_4$ ), 129.4 (bpdzC-4a,8a), 129.6 (bpdzC), 131.0 ( $C_6H_4$ ), 137.2 (bpdzC), 150.7 (bpdzC-1,4), n. o. (BC).

**Synthesis of Li[7].** Lithium 4-trimethylsilylpyrazolide (24.7 mg, 0.169 mmol; prepared from 4-trimethylsilylpyrazole and *n*-butyllithium in hexane) was dissolved in a mixture of benzene (5 cm<sup>3</sup>) and THF (0.03 cm<sup>3</sup>) and added at r. t. via syringe to a stirred solution of **3** (49.1 mg, 0.164 mmol) in benzene (6 cm<sup>3</sup>). After 1 h, all volatiles were removed from the clear solution in vacuum and the residue was redissolved in THF (5 cm<sup>3</sup>). The resulting clear solution was concentrated to saturation under reduced pressure and stored at -40 °C for 15 h to yield colourless X-ray quality crystals of Li(thf)<sub>4</sub>[7]·THF (46 mg, 41% based on isolated single crystalline material).

<sup>1</sup>H NMR: δ<sub>H</sub>(300.0 MHz; C<sub>6</sub>D<sub>6</sub>) -0.01 (9 H, s, SiCH<sub>3</sub>), 4.79 (2 H, br s, *h*<sub>1/2</sub> = 190 Hz, BH), 7.04 (4 H, m, C<sub>6</sub>H<sub>4</sub>), 7.71 (2 H, s, pzH-3,5), 7.97 (4 H, m, C<sub>6</sub>H<sub>4</sub>); <sup>11</sup>B NMR: δ<sub>B</sub>(96.3 MHz; C<sub>6</sub>D<sub>6</sub>) -5.8 (br s, *h*<sub>1/2</sub> = 350 Hz); <sup>13</sup>C{<sup>1</sup>H} NMR: δ<sub>C</sub>(75.5 MHz; C<sub>6</sub>D<sub>6</sub>) -0.3 (SiCH<sub>3</sub>), 112.4 (pzC-4), 124.5 (C<sub>6</sub>H<sub>4</sub>), 131.8 (C<sub>6</sub>H<sub>4</sub>), 136.2 (pzC-3,5), n. o. (BC); <sup>29</sup>Si NMR (INEPT): δ<sub>Si</sub>(59.6 MHz; C<sub>6</sub>D<sub>6</sub>) -11.4; ESI-MS: *m/z* 315.2 ([7]<sup>-</sup>, 100%). Found: C, 66.4; H, 8.8; N, 4.4. C<sub>34</sub>H<sub>53</sub>B<sub>2</sub>LiN<sub>2</sub>O<sub>4</sub>Si requires C, 66.9; H, 8.75; N, 4.6.

## 2. Single crystal X-ray structure analyses of **3**, **6**·THF, Li(thf)<sub>4</sub>[7]·THF

**Crystal data of 3.** C<sub>16</sub>H<sub>22</sub>B<sub>2</sub>S<sub>2</sub>, *M* = 300.08 g mol<sup>-1</sup>, monoclinic, *a* = 14.0791(11) Å, *b* = 7.3214(5) Å, *c* = 16.6356(14) Å, β = 102.414(6)°, *V* = 1674.7(2) Å<sup>3</sup>, *T* = 173(2) K, space group *P*2<sub>1</sub>/*n*, *Z* = 4, μ(Mo-K<sub>α</sub>) = 0.305 mm<sup>-1</sup>, 18440 reflections measured, 3128 unique (*R*<sub>int</sub> = 0.0764) which were used in all calculations. The final *wR*(*F*<sup>2</sup>) was 0.0947 (all data).

**Crystal data of 6·THF.** C<sub>24</sub>H<sub>24</sub>B<sub>2</sub>N<sub>2</sub>O, *M* = 378.07 g mol<sup>-1</sup>, triclinic, *a* = 10.6419(7) Å, *b* = 13.8641(8) Å, *c* = 13.8898(9) Å, α = 91.748(5)°, β = 95.552(5)°, γ = 92.350(5)°, *V* = 2036.8(2) Å<sup>3</sup>, *T* = 173(2) K, space group *P*1, *Z* = 4, μ(Mo-K<sub>α</sub>) = 0.074 mm<sup>-1</sup>, 34216 reflections measured, 7626 unique (*R*<sub>int</sub> = 0.0887) which were used in all calculations. The final *wR*(*F*<sup>2</sup>) was 0.2108 (all data).

The compound crystallises together with one equivalent of THF molecules, which are disordered. The asymmetric unit contains two crystallographically independent molecules, **6**·THF<sub>A</sub> and **6**·THF<sub>B</sub>. Since most structure parameters of **6**·THF<sub>A</sub> and **6**·THF<sub>B</sub> are the same within the experimental error margins, only the plot and selected data of **6**·THF<sub>A</sub> are shown in Fig. S2.

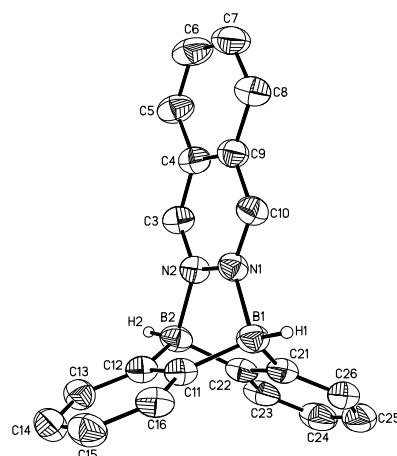

**Fig. S2** Molecular structure and numbering scheme of compound **6**·THF<sub>A</sub>; displacement ellipsoids are drawn at the 50% probability level; protons attached to carbon atoms and the THF molecule are omitted for clarity. Selected bond lengths [Å], atom···atom distances [Å], bond angles [°] and dihedral angles [°]: B(1)–C(11) = 1.617(4), B(1)–C(21) = 1.602(4), B(2)–C(12) = 1.614(4), B(2)–C(22) = 1.609(4), B(1)–N(1) = 1.641(3), B(2)–N(2) = 1.639(3), B(1)–H(1) = 1.12(3), B(2)–H(2) = 1.17(3), B···B = 2.730(4); C(11)–B(1)–C(21) = 108.7(2), C(12)–B(2)–C(22) = 108.9(2), C(11)–B(1)–N(1) = 102.2(2), C(21)–B(1)–N(1) = 102.3(2), C(12)–B(2)–N(2) = 101.9(2), C(22)–B(2)–N(2) = 102.6(2), B(1)–N(1)–N(2) = 114.5(2), B(2)–N(2)–N(1) = 114.1(2); Ar(C(11))//Ar(C(21)) = 126.9, B(1)C(11)C(21)/B(2)C(12)C(22) = 88.7.

**Crystal data of Li(thf)<sub>4</sub>[7]·THF.** C<sub>38</sub>H<sub>61</sub>B<sub>2</sub>LiN<sub>2</sub>O<sub>5</sub>Si, *M* = 682.54 g mol<sup>-1</sup>, monoclinic, *a* = 10.0824(12) Å, *b* = 17.4274(15) Å, *c* = 12.4327(16) Å, β = 110.322(9)°, *V* = 2048.6(4) Å<sup>3</sup>, *T* = 173(2) K, space group *P*2<sub>1</sub>, *Z* = 2, μ(Mo-K<sub>α</sub>) = 0.098 mm<sup>-1</sup>, 12751 reflections measured, 7065 unique (*R*<sub>int</sub> = 0.0377) which were used in all calculations. The final *wR*(*F*<sup>2</sup>) was 0.1822 (all data). Flack *x*-parameter = -0.04(19).

CCDC reference numbers: 762845 (**3**), 762846 (**6**·THF), 762847 (Li(thf)<sub>4</sub>[7]·THF).
